1 **Postural control telerehabilitation with a low-cost virtual reality protocol for children**  
2 **with cerebral palsy: Protocol for a clinical trial.**

3

4 Valeska Gatica-Rojas<sup>a\*</sup>, Ricardo Cartes-Velásquez<sup>b</sup>, Alex Soto-Poblete<sup>c</sup> and Luis Eduardo  
5 Cofré Lizama<sup>d</sup>

6

7 a\*. Tele-rehabilitation technology center and Neurosciences in Human Movement, Faculty  
8 of Health Sciences, Universidad de Talca. Av. Lircay S/N, Talca, Chile. Email address:  
9 valeskagaticar@gmail.com

10 b. Fundación Kimntrum, Concepción, Chile. Email address: cartesvelasquez@gmail.com

11 c. Institute of Mathematics and Physics, Universidad de Talca. Av. Lircay S/N, Talca,  
12 Chile. Email address: alsoto@utalca.cl

13 d. School of Allied Health, Human Services and Sports, La Trobe University, Victoria,  
14 Australia. Email address: e.cofrelizama@latrobe.edu.au

15

16 Corresponding author: Dr Valeska Gatica-Rojas at Tele-rehabilitation technology center  
17 and Neurosciences in Human Movement, Faculty of Health Sciences, Universidad de  
18 Talca, Av. Lircay S/N, Talca, Chile. Tel: +56 71 2418859. E-mail:  
19 valeskagaticar@gmail.com

20

21

22

23

24

25

26

27

28

29

30

31

32 **Abstract**

33 **Objective:** To establish the feasibility and effectiveness of a rehabilitation programme  
34 using low-cost virtual reality aimed at improving postural control in children with cerebral  
35 type palsy spastic hemiplegia. It also seeks to compare low-cost virtual reality under two  
36 delivery modalities, telerehabilitation (TR) and face-to-face (FtF).

37 **Methods:** Randomized controlled clinical trial from the ACTRN platform  
38 ACTRN12621000117819. Eighteen sessions of low-cost virtual reality therapy will be  
39 provided through both, FtF and TR modalities using a Nintendo Wii balance board. Each  
40 programme will last for 6 weeks and will consist of 3 sessions per week of 25 minutes  
41 each. The participants will include 40 patients diagnosed with cerebral palsy type spastic  
42 hemiplegia. Twenty participants for each group. Participants will be assessed at baseline,  
43 by the end of weeks 2, 4, and 6, and at weeks 8 and 10 (post-intervention follow-ups).  
44 Clinical measures include the Modified-Modified Ashworth Scale for lower limbs,  
45 Modified Ashworth Scale for upper limbs, timed up-and-go tests, the timed one-leg  
46 standing and 6-minute walk test. Posturographic measures, including sway area and  
47 velocity, under six conditions will be used: 2 statics and 4 dynamic conditions, which  
48 include voluntary sway in the mediolateral direction following a metronome set at 30Hz  
49 and 60Hz, and sway while playing 2 different videogames.

50 **Results:** This study provides an assessment of the feasibility and effectiveness of an  
51 affordable rehabilitation programme using low-cost virtual reality aimed at improving  
52 postural control in children with cerebral palsy.

53 **Conclusion:** Rehabilitation programme using low-cost virtual reality will improve postural  
54 control in children with cerebral palsy type spastic hemiplegia and this programme  
55 delivered using TR will be as effective as a FtF modality. The TR programme has be  
56 designed to expand the coverage of physiotherapy services for children with cerebral palsy  
57 in low-resource settings and in remote areas.

58

59 **Keywords:** telerehabilitation; cerebral palsy; balance, virtual reality; covid-19 pandemic.

60

## 61 **Introduction**

62 Cerebral palsy (CP) is the most common condition treated by therapists in infant  
63 neurological units, and it is the most common cause of motor disability in children and  
64 adolescents,<sup>1,2</sup> with an increasing prevalence in developing countries.<sup>3</sup> According to the  
65 topographical classification, spastic hemiplegia (SHE) is one of the most prevalent types of  
66 CP.<sup>1,4</sup> In SHE, the mobility of one side of the body is more affected, generating poor  
67 postural control during standing, leading to impaired performance in of daily functional  
68 activities.<sup>5,6</sup> To date, most studies have focused in developing interventions to improve  
69 upper-limb function in SHE, for example, virtual reality interventions, which further allow  
70 undertaking therapeutic training at home.<sup>7-9</sup> The development of therapeutic interventions  
71 aimed at improving postural control, on the other hand, has received less attention.<sup>10-12</sup>

72 Efficient, inexpensive, accessible, and engaging are some of the highlighted characteristics  
73 sought after in the development of novel physiotherapy interventions, particularly in  
74 children.<sup>13-16</sup> Since the recent COVID-19 pandemic has interrupted non-essential  
75 rehabilitation services, including those focusing on patients with CP, an urgent need for  
76 remotely deliverable and less supervised interventions has also been highlighted to provide  
77 health access to underserved populations.<sup>17</sup> In this regard, telerehabilitation (TR) with the  
78 use low-cost technological tools and exergames provide with an opportunity to meet the  
79 before mentioned needs and which can further expand qualitatively and quantitatively  
80 neurorehabilitation practice. This TR approach is not excluding of at-clinic interventions,  
81 which combined may allow for a flexible dual-care model that integrates hospital and  
82 home-based rehabilitation.<sup>13</sup> To date, two earlier studies using TR in children with CP have  
83 shown promising results in terms of feasibility and effectiveness compared with standard  
84 face-to-face (FtF) interventions, however, these studies have not reported objective  
85 outcomes.<sup>14,15</sup>

86 Low-cost virtual reality exergames are well-accepted by children and adolescents due to  
87 their ludic, motivating and engaging features, which facilitate a nearly seamless  
88 incorporation into TR.<sup>16</sup> However, research on TR using low-cost virtual reality is yet in its  
89 infancy as high-level evidence comparing this modality with standard FtF interventions is  
90 still lacking. It is noteworthy that low-cost virtual reality TR also brings the possibility to  
91 standardize rehabilitation interventions, which is a pending task in neurorehabilitation.<sup>18</sup>

92 This clinical trial protocol seeks to establish the feasibility and effectiveness of a  
93 rehabilitation programme using low-cost virtual reality aimed at improving postural control  
94 in children with CP. It also seeks to compare low-cost virtual reality under two delivery  
95 modalities, telerehabilitation (TR) and face-to-face (FtF, control group). We hypothesize  
96 that a rehabilitation programme using low-cost virtual reality will improve postural control  
97 in children with CP and that this programme delivered using TR will be as effective as a  
98 FtF modality. The TR programme is designed to expand the coverage of physiotherapy  
99 services for children with CP in low-resource settings and in remote areas, but also to  
100 provide access to physiotherapy during restricted mobility as in the case of recent COVID-  
101 19-related lockdowns.

102

## 103 **Materials and methods**

### 104 **Funding**

105 This study was supported by the Innovation Fund for Competitiveness, Maule Regional  
106 Government – Chile No. 30.481.923-0.

107

### 108 **Design**

109 This is a double blinded, randomized, controlled trial designed following the Standard  
110 Protocol Items: Recommendations for Interventional Trials (SPIRIT), (figure 1).<sup>19</sup>

111 The trial adheres to the Declaration of Helsinki and the Chilean laws of rights and duties of  
112 the patient and research in humans. Ethical approval was obtained from the Ethics  
113 Committee of the University of Talca (Ref. No. 24-2018). This study was registered with  
114 the Australian and New Zealand Clinical Trials Registry (ACTRN12621000117819).  
115 Written informed consent will be obtained from parents and participants over 7 years old;  
116 verbal assent will be obtained from younger children.

117

### 118 **Study setting**

119 This study compares the effects of low-cost virtual reality in two distinct settings. The first  
120 setting is clinical (Telerehabilitation Technology Centre and Neurosciences in Human  
121 Movement, Universidad de Talca, Talca, Chile) and in which low-cost virtual reality is  
122 delivered in a FtF modality (control group) with therapist interacting directly with the

123 patient. The second setting is a remote facility with no therapist on-site for the delivery of  
124 low-cost virtual reality through TR, and could be an at-home, school, or rehabilitation  
125 centre. The choice of setting will depend on each participant's adequate access to space and  
126 equipment. All assessments will be conducted at the facility in which therapy was  
127 conducted.

128

### 129 **Sample size**

130 The sample size was calculated to detect clinically relevant changes in postural control after  
131 low-cost virtual reality in both groups by the end of week 6. Using data from earlier  
132 studies,<sup>11,28</sup> we considered a standard deviation of 4.974 cm<sup>2</sup> for the CoP sway area  
133 (CoP<sub>Sway</sub>), an alpha level of 0.05, 80% statistical power, and an allowance for 5% attrition;  
134 we required a minimum of 20 participants in each group (total sample of 40).

135

### 136 **Eligibility criteria**

137 The inclusion criteria are as follows: (1) levels I or II on the Gross Motor Function  
138 Classification System (GMFCS)<sup>20</sup> and on the Expanded and Revised Gross Motor Function  
139 Classification System (GMFCS-ER)<sup>21</sup>; (2) aged 7 to 14 years (both sexes) with CP type  
140 spastic hemiplegia; and (3) having mild or no cognitive impairment. Exclusion criteria  
141 includes patients with other than CP neurological disorders, epilepsy, and uncorrected  
142 vision or hearing. Participants with access to a Nintendo Wii at home before the  
143 intervention commences will be also excluded.

144

### 145 **Interventions**

146 This study will compare the effects of low-cost virtual reality delivered through FtT and TR  
147 modalities. The low-cost virtual reality will consist of in using a Nintendo Wii balance  
148 board to play 4 exergames. In the FtF group therapy will be provided by a physiotherapist  
149 with experience in the use of exergames for rehabilitation. In the TR modality, the  
150 intervention (low-cost virtual reality) will be delivered by the patient's parent or caregivers.  
151 In total, both groups (FtF and TR) will receive 18 sessions of low-cost virtual reality  
152 divided in 3 sessions per week (Monday, Wednesday, and Friday) over a period of 6 weeks.  
153 Each session will last for 25 minutes in which each participant will perform three series of

154 exergames resting 2 minutes in between. The first two series will include Snowboard,  
155 Penguin Slide, and Super Hula Hoop. The first series is played with arms on the side and  
156 the second one with hands on the waist to avoid the potential effect of training under one or  
157 the other strategy. The third series is deep breathing in the Yoga game. During the first 2  
158 weeks of training (first 6 sessions), patients will receive manual guidance and verbal  
159 instructions after which (7<sup>th</sup> session onwards) only verbal instructions will be provided by  
160 the parents, caregiver, or physiotherapist.

161 In the Snowboard exergame patients displace their centre of pressure (CoP) in the anterior-  
162 posterior direction to swerve around flags whereas in the Penguin Slide movement occur on  
163 the medial-lateral direction as patients need to score by catching fishes while maintaining a  
164 penguin inside a continuously tilting platform. Finally, the Hula Hoop consists in  
165 maintaining hoops on the waist while moving the CoP in a clockwise and anticlockwise  
166 circular pattern. In the Yoga game the aim is to stand as quite as possible first with eyes  
167 open and then with the eyes closed

168 This low-cost virtual reality programme is based on previous studies that have  
169 demonstrated similar interventions can effectively train overall postural control.<sup>11</sup> For all  
170 participants in both groups (FtF and TR), adherence will be encouraged through telephone  
171 reminders. No modifications of the intervention protocols throughout the study are  
172 considered at this stage.

173

## 174 **Outcomes**

175 Differences between the effects of FtF and TR using low-cost virtual reality on postural  
176 control will be assessed using posturographic measures. In brief, posturography assesses  
177 postural control through measures of the centre-of-pressure sway, of which the most  
178 commonly used are sway area and trajectories and velocity; total and in the medial-lateral  
179 and anterior-posterior directions.<sup>22</sup> These CoP variables have been shown to be sensitive in  
180 determining changes in postural control due to training in young adults,<sup>23</sup> patients with  
181 post-stroke hemiparesis,<sup>24</sup> patients with Parkinson's disease,<sup>25</sup> and children with CP.<sup>26-30</sup>

182 Primary outcome in this study will be the CoP sway area (CoP<sub>area</sub>), which has been shown  
183 to be a reliable and valid measure of postural control in different clinical and nonclinical  
184 populations.<sup>22-30</sup> The CoP<sub>area</sub> is an overall measure of the ability of the balance control

185 system to maintain a stable upright posture, to note, higher CoP<sub>area</sub> values indicate poorer  
186 balance control.

187 Secondaries outcome measures from the posturographic assessments to be used in this  
188 study will be: standard deviation and velocity of the CoP in the medial-lateral and anterior-  
189 posterior directions. The CoP standard deviation is a measure of the variability of CoP  
190 displacements whereas the CoP velocity is a measure of the ability to react to changes in  
191 posture with larger values indicating poorer balance control. The latter is due to late  
192 postural adjustments lead to large CoP excursion that demand rapid corrections to maintain  
193 stability.<sup>22</sup>

194 Tertiary outcomes of this study will be: the Modified Modified Ashworth Scale (MMAS)  
195 for lower limbs (ankle and knee flexor-extensor musculature), Modified Ashworth Scale  
196 (MAS) for upper limbs (elbow and wrist flexor-extensor musculature), timed up-and-go  
197 (TUG) tests, the timed one-leg standing (TOLS) and 6-minute walk test (6MWT). These  
198 are widely used clinical measures of spasticity (MMAS and MAS) and overall physical  
199 performance, which include some aspects of postural control (TOLS) and dynamic balance  
200 (TUG and 6MWT).

201

### 202 **Intervention timeline**

203 Participants will be assessed at baseline, by the end of weeks 2, 4, and 6, and at weeks 8  
204 and 10 (post-intervention follow-ups) using posturography and clinical measures.

205

### 206 **Recruitment**

207 Children and adolescents with congenital SHE-CP will be recruited from the Rehabilitation  
208 Institute, Talca, Chile. This is an outpatient clinic that provides rehabilitation services to  
209 patients with neurological disorders including CP children. It is noteworthy, that patients  
210 from this centre will have little or no experience using a Nintendo Wii balance board. An  
211 experienced staff of health professionals, comprised of a physician and two physical  
212 therapists, will recruit participants according to the inclusion/exclusion criteria. Screening  
213 for potential participants will continue until the calculated sample size is achieved.

214

### 215 **Allocation**

216 Participants will be randomly assigned to either control (FtF) or experimental group (TR)  
217 with a 1:1 allocation as per a computer-generated randomization schedule stratified by site  
218 and the baseline score of the Action Arm Research Test (ARAT;  $\leq 21$  versus  $>21$ ) using  
219 permuted blocks of random sizes. The block sizes will not be disclosed, to ensure  
220 concealment.

221

## 222 **Management**

223 Participants will be informed of the group they will be randomly assigned to at the  
224 beginning of the study. Participants in each group will be systematically asked about the  
225 content of the interventions received to maintain engagement and compliance. Due to the  
226 nature of the intervention neither participants nor staff can be blinded to allocation, but are  
227 strongly inculcated not to disclose the allocation status of the participant at the follow up  
228 assessments. An employee outside the research team will feed data into the computer in  
229 separate datasheets so that the researchers can analyse data without having access to  
230 information about the allocation.

231 All raw data will be electronically saved in coded text files whereas calculated and clinical  
232 outcomes measures will be saved in a coded Excel spreadsheet. Data backups will be made  
233 every week.

234

## 235 **Data collection**

236 All measurements will be performed at the same time of the day, under the same conditions  
237 and by the same assessor at each time point. Posturographic measures (CoP displacements)  
238 for both groups will be collected using an AMTI OR67 force platform (Watertown, MA,  
239 USA). The AMTI NetForce software (Watertown, MA, USA) will be used for the  
240 acquisition of moments and forces at 200Hz Data will be recorded, coded, and stored on a  
241 personal computer. CoP variables will be calculated in Matlab R2012 (Mathworks Inc.,  
242 Natick, MA, USA).

243 All primary and secondary posturographic measures will be assessed under 2 static and 4  
244 dynamic conditions for 30 seconds each: (i) standing still with eyes open, (ii) standing still  
245 with eyes closed, voluntary sway in the mediolateral direction following a metronome set at  
246 (iii) 30Hz and (iv) 60Hz, and multidirectional sway while playing 2 different videogames



247 that challenge (v) anterior-posterior postural control (snowboard) and (vi) medial-lateral  
248 postural control (penguin). It is expected that all assessments, including clinical ones, will  
249 be completed within 30 minutes.

250

### 251 **Data analysis**

252 Statistical analyses will be performed using SPSS 20.00 for Windows. Descriptive statistics  
253 will be used to calculate the demographic and clinical characteristics of participants in both,  
254 FtF and TR groups (unpaired t-tests and  $\chi^2$  tests).

255 For all outcome measures, the Shapiro–Wilk and Levene tests will be used to measure the  
256 normality and homogeneity of the variance, respectively. The Mann–Whitney U test will be  
257 used to determine differences between the FtF and TR groups. Friedman’s one-way  
258 analysis of variance (ANOVA) with post hoc pairwise comparisons (Wilcoxon signed-rank  
259 test) will be used to determine the effect over time for each group (FtF and TR). For all  
260 analyses, a  $p$ -value  $\leq 0.05$  will be considered statistically significant.

261

### 262 **Data monitoring**

263 A permanent monitoring will be made by the clinical team, oversights by the research  
264 team and the Ethics Committee of the University of Talca. All the possible adverse events  
265 will be informed immediately to the Ethics Committee of the University of Talca to  
266 determine trial’s modifications or stop.

267

### 268 **Discussion**

269 The aims of this clinical trial protocol are to establish the feasibility and effectiveness of a  
270 low-cost virtual reality to improve postural control in children with CP and to compare two  
271 low-cost virtual reality delivery modalities, telerehabilitation (TR) and face-to-face (FtF).  
272 Demonstrating that a TR is as efficient as a FtF intervention is crucial to adopt TR as an  
273 alternative to expand the coverage of rehabilitation services for children with CP in low-  
274 resource settings and in remote areas. Further, by showing the efficacy of TR as a method  
275 to deliver low-cost virtual reality, physiotherapy can be potentially delivered when services  
276 are inaccessible or closed as in the case of recent covid-19-related lockdowns. In this  
277 protocol we hypothesize that low-cost virtual reality will improve postural control and that

278 both delivery methods will be equally effective. The latter is reasonable considering that  
279 our previous research has shown that the FtF modality is effective in improving static and  
280 dynamic postural control and reducing spasticity in children and adolescents with spastic  
281 cerebral palsy.<sup>29-32</sup>

282

283 High-intensity physiotherapy is necessary for optimizing motor learning and improve  
284 physical skills in patients with CP.<sup>33</sup> Regrettably, children and adolescents with CP  
285 typically receive limited physiotherapy sessions, which implies a lost opportunity to  
286 improve the functionality and quality of life of these patients during a critical period of  
287 their lives. It is important to note that the neural maturity of sensory systems responsible for  
288 the control of postural balance is sequential and dependent on age, reaching full maturity at  
289 15-16 years.<sup>34, 35</sup> Therefore, providing postural control rehabilitation during this age period  
290 is essential to generate changes in the lives of these patients that will accompany them into  
291 adulthood.

292 There are several factors that affect standing balance: not only the type of CP but also other  
293 medical and environmental conditions. This diversity habitually demands for tailored  
294 therapy that is not easily accessible, especially in low-resource and/or rural settings. Then,  
295 this heterogeneity is consistent with the plethora of interventions available that are hard to  
296 standardize precisely because of the diversity of patients, their needs, environments, and  
297 resources, among other aspects<sup>36-39</sup>.

298 Virtual reality and low-cost virtual reality could alleviate this tension by creating a plethora  
299 of programs that can be replicated in different settings in a tailored way.

300 In this regard, virtual environments created by software are characterized as artificial  
301 functional spaces of multi-sensory interaction with a motivational purpose and are easy to  
302 manipulate.<sup>40</sup> These virtual environments can be tailored for each patient, but all these  
303 modifications are transferable for other patients and settings; this eventuality provides the  
304 possibility to standardize most of the rehabilitation therapy. Furthermore, the  
305 standardization of virtual reality-based therapies seems to be related to the adoption of  
306 commercial video games,<sup>41,42</sup> which are widely accessible worldwide. However, this does  
307 not guarantee that these kinds of therapies are really standardized. The number of sessions,  
308 duration, sequence, games, intervals, and other aspects need to be defined to obtain a

309 transferable standard. A recent systematic review on the effectiveness of virtual reality in  
310 children and young adults with CP found limited confidence in effect estimation for  
311 utilising virtual reality in this population; thus, further research is necessary.<sup>18</sup>

312 A low-cost virtual reality device provides greater accessibility and transferability to patients  
313 with CP at neurological care centers. The Nintendo Wii system offers a simple and  
314 affordable mode of virtual reality therapy.<sup>43,44</sup> The Nintendo Wii and its peripheral balance  
315 board have been proposed as a training tool to improve standing balance in the elderly,  
316 adults with total knee replacements, post-stroke patients, and patients with Parkinson's  
317 disease.<sup>9,45-48</sup>

318 Another important consideration to generate relevant evidence is comprehensive  
319 measurements. Thus, evaluations to build postural control construct and to determine the  
320 effects of physical interventions in these populations must include clinical and laboratory  
321 measurements. This clinical trial includes a set of clinical and laboratory evaluations that  
322 enable knowing the effects of these therapies in the different aspects of postural control, for  
323 example, the levels of the sensory systems—visual, vestibular, and mechanoreceptive  
324 systems—in static and dynamic motor skills, within them include walking.

325 Home-based therapies for patients with CP seem to be feasible; however, the available  
326 studies have used diverse methods and strategies, and, therefore, it is hard to determine the  
327 impact of these kinds of therapies.<sup>49</sup> An efficient way to deliver these home-based therapies  
328 is using TR, which appears to be an option to improve physical function in patients with  
329 disabilities. However, most research has included low-quality evidence studies that make it  
330 impossible to determine the effectiveness of TR.<sup>50</sup> In the case of patients with CP, two  
331 studies have shown promising results,<sup>13,14</sup> but the evidence is far from conclusive.

332

333 We have selected posturographic measures that have shown to be sensitive to the effects of  
334 physiotherapy interventions.<sup>51-52</sup> Velocity of CoP describes the neuromuscular response to  
335 shifts in the body's centre of mass and serves as an indicator of stability. The mean velocity  
336 of CoP has high reliability (ICC > 0.8) as a measurement parameter during standing  
337 balance and is sensitive to changes of age-related postural impairment.<sup>52</sup> However, the area  
338 of the CoP presents behaviour that is more difficult to modify after physical interventions  
339 in physiotherapy. For the area of the CoP (CoP<sub>Sway</sub>), greater values indicate poorer balance

340 control as CoP gets closer to the limit of stability, which demands rapid stabilization  
341 responses expressed in greater CoP velocities ( $V_{ML}$  and  $V_{AP}$ ). Generating a modification in  
342 postural control, specifically reducing the CoP area, involves working exhaustively at a  
343 dose capable of achieving it. The dose in this study has been reviewed and verified both  
344 with the scientific literature and tested in previous research.<sup>28</sup> There are correlation studies  
345 between posturographic platform variables and clinical variables. In line with this, the area  
346 of the CoP and other variables are poorly correlated with the clinical variables.<sup>53,54</sup> These  
347 findings suggest that the dose of physical therapies should be constantly reviewed, and  
348 second, that clinical variables are more difficult to be transformed after a physical  
349 intervention. This is related to the interpretation of the patients themselves in the face of  
350 physical changes that their body and motor control has. There is evidence that the  
351 perceptions of better postural control, balance, static, and dynamic stability by patients are  
352 conditioned by the positive changes in the clinical variables investigated in these  
353 evaluations. Therefore, it is essential to know the effects of this type of virtual physical  
354 therapy in clinical trials and to consider pertinent clinical and gold standard laboratory  
355 evaluations, such as the force platform, both of which will build the postural control  
356 construct and interpret the results towards the patients.

357

358 Despite being discontinued in 2014, the Nintendo Wii continues to be a relevant tool for  
359 neurorehabilitation research. Recent research using this console to treat patients with CP  
360 has shown positive effects compared to other kinds of rehabilitation services.<sup>55-57</sup>

361

362 This will be the first study assessing the effects of a six-week exercise programme remote  
363 (TR) using a Nintendo Wii balance board to improve standing balance in children and  
364 adolescents with CP type spastic hemiplegia compared with the effects of an FtF modality.  
365 This trial will provide evidence on the effectiveness of the Nintendo Wii for improving  
366 standing balance in patients with CP, a matter in which the current evidence is lacking. This  
367 low-cost virtual reality TR programme is designed to expand the coverage of physical  
368 therapy services for patients with CP in low-resource settings using affordable products,  
369 such as the Nintendo Wii balance board. The scientific contribution towards improving  
370 static or dynamic standing balance will support the idea that affordable technological tools

371 can positively contribute to the usual activities, such as walking, running, and climbing  
372 stairs, that children with CP perform in their environment, namely playgrounds, schools,  
373 and in the cities where they live. During the pandemic, the development of new  
374 technological strategies in physical therapies has contributed to the advancement in  
375 rehabilitation, this should allow in the future to install new proposals in physical  
376 rehabilitation for the children with CP type spastic hemiplegia.

377

378

380 **References**

- 381 [1] Xianrong L, Zhujiang T, Guojun Y, et al. Effectiveness of exercise interventions for  
382 children with cerebral palsy: A systematic review and meta-analysis of randomized  
383 controlled trials. *J Rehabil Med* 2021 Apr 1;53(4):jrm00176.
- 384 [2] Oskoui M, Coutinho F, Dykeman J, et al. An update on the prevalence of cerebral  
385 palsy: a systematic review and meta-analysis. *Dev. Med. Child Neurol.* 2013; 55: 509-19.
- 386 [3] Shengyi Y, Jiayue X, Jing G, et al. Increasing prevalence of cerebral palsy among  
387 children and adolescents in China 1988-2020: A systematic review and meta-analysis. *J*  
388 *Rehabil Med* 2021 May 24;53(5):jrm00195.
- 389 [4] Saxena S, Rao BK, Kumaran S. Analysis of postural stability in children with  
390 cerebral palsy and children with typical development: an observational study. *Pediatr. Phys.*  
391 *Ther.* 2014; 26: 325-30.
- 392 [5] Rojas VG, Rebolledo GM, Muñoz EG, et al. Differences in standing balance  
393 between patients with diplegic and hemiplegic cerebral palsy. *Neural Regen. Res.* 2013; 8:  
394 2478-83.
- 395 [6] Kassee C, Hunt C, Holmes MWR, et al. Home-based Nintendo Wii training to  
396 improve upper-limb function in children ages 7 to 12 with spastic hemiplegic cerebral  
397 palsy. *J. Pediatr. Rehabil. Med.* 2017; 10: 145-154.
- 398 [7] El-Shamy SM. Efficacy of Armeo Robotic Therapy Versus Conventional Therapy  
399 on Upper Limb Function in Children With Hemiplegic Cerebral Palsy. *Am. J. Phys. Med.*  
400 *Rehabil.* 2018; 97: 164-169.
- 401 [8] Shum LC, Valdes BA, Hodges NJ, et al. Error Augmentation in Immersive Virtual  
402 Reality for Bimanual Upper-Limb Rehabilitation in Individuals With and Without  
403 Hemiplegic Cerebral Palsy. *IEEE Trans. Neural Syst. Rehabil. Eng.* 2020; 28: 541-549.
- 404 [9] Jelsma J, Pronk M, Ferguson G, et al. The effect of the Nintendo Wii Fit on balance  
405 control and gross motor function of children with spastic hemiplegic cerebral palsy. *Dev.*  
406 *Neurorehabil.* 2013; 16: 27–37.
- 407 [10] Gatica-Rojas V, Méndez-Rebolledo G, Guzman-Muñoz E, et al. Does Nintendo Wii  
408 Balance Board improve standing balance? A randomized controlled trial in children with  
409 cerebral palsy. *Eur. J. Phys. Rehabil. Med.* 2017; 53: 535-544.

- 410 [11] Do JH, Yoo EY, Jung MY, et al. The effects of virtual reality-based bilateral arm  
411 training on hemiplegic children's upper limb motor skills. *NeuroRehabilitation*. 2016; 38:  
412 115-27.
- 413 [12] Nuara A, Fabbri-Destro M, Scalona E, et al. Telerehabilitation in response to  
414 constrained physical distance: an opportunity to rethink neurorehabilitative routines. *J.*  
415 *Neurol*. 2021; 2021: 1-12.
- 416 [13] Beani E, Menici V, Ferrari A, et al. Feasibility of a Home-Based Action  
417 Observation Training for Children With Unilateral Cerebral Palsy: An Explorative Study.  
418 *Front. Neurol*. 2020; 11: 16.
- 419 [14] Molinaro A, Micheletti S, Pagani F, et al. Action Observation Treatment in a tele-  
420 rehabilitation setting: a pilot study in children with cerebral palsy. *Disabil. Rehabil*. 2020;  
421 17: 1-6.
- 422 [15] Demers M, Martinie O, Winstein C, et al. Active Video Games and Low-Cost  
423 Virtual Reality: An Ideal Therapeutic Modality for Children With Physical Disabilities  
424 During a Global Pandemic. *Front. Neurol*. 2020;14: 601898.
- 425 [16] Westby A, Nissly T, Giesecker R, et al. Achieving Equity in Telehealth: "Centering  
426 at the Margins" in Access, Provision, and Reimbursement. *J. Am. Board Fam. Med*. 2021;  
427 34: S29-S32.
- 428 [17] Ayala L, Winter S, Byrne R, et al. Assessments and Interventions for Spasticity in  
429 Infants With or at High Risk for Cerebral Palsy: A Systematic Review. *Pediatr. Neurol*.  
430 2020; 20: S0887-8994(20)30349-0.
- 431 [18] Fandim JV, Saragiotto BT, Porfirio GJM, et al. Effectiveness of virtual reality in  
432 children and young adults with cerebral palsy: a systematic review of randomized  
433 controlled trial. *Braz. J. Phys. Ther*. 2020; 20: S1413-3555(20)31132-1.
- 434 [19] Chan A-W, Tetzlaff JM, Altman DG, et al. SPIRIT 2013 Statement: Defining  
435 standard protocol items for clinical trials. *Ann Intern Med* 2013;158:200-207.
- 436 [20] Palisano R, Rosenbaum P, Walter S, et al. Development and reliability of a system  
437 to classify gross motor function in children with cerebral palsy. *Dev. Med. Child Neurol*.  
438 1997; 39: 214-23.

- 439 [21] Fowler EG, Staudt LA, Greenberg MB, et al. Selective Control Assessment of the  
440 Lower Extremity (SCALE): development, validation, and interrater reliability of a clinical  
441 tool for patients with cerebral palsy. *Dev. Med. Child Neurol.* 2009; 51: 607-14.
- 442 [22] Duarte M, Freitas SM. Revision of posturography based on force plate for balance  
443 evaluation. *Rev. Bras. Fisioter.* 2010; 14: 183-92.
- 444 [23] Kenny RPW, Atkinson G, Eaves DL, et al. The effects of textured materials on  
445 static balance in healthy young and older adults: A systematic review with meta-analysis.  
446 *Gait Posture.* 2019; 71: 79-86.
- 447 [24] Ioffe ME, Ustinova KI, Chernikova LA, et al. Supervised learning of postural tasks  
448 in patients with poststroke hemiparesis, Parkinson's disease or cerebellar ataxia. *Exp. Brain*  
449 *Res.* 2006; 168: 384–94.
- 450 [25] Rocchi L, Chiari L, Cappello A, et al. Identification of distinct characteristics of  
451 postural sway in Parkinson's disease: a feature selection procedure based on principal  
452 component analysis. *Neurosci. Lett.* 2006; 394: 140–5.
- 453 [26] Donker SF, Ledebt A, Roerdink M, et al. Children with cerebral palsy exhibit  
454 greater and more regular postural sway than typically developing children. *Exp. Brain Res.*  
455 2008; 184: 363-70.
- 456 [27] Cherng RJ, Su FC, Chen JJ, et al. Performance of static standing balance in children  
457 with spastic diplegic cerebral palsy under altered sensory environments. *Am. J. Phys. Med.*  
458 *Rehabil.* 2007; 78: 336–43.
- 459 [28] Gatica VF, Velásquez IS, Méndez GA, et al. Differences in standing balance in  
460 patients with cerebral palsy and typically developing children. *Biomedica.* 2014; 34: 102-9.
- 461 [29] Gatica-Rojas V, Cartes-Velásquez R, Méndez-Rebolledo G, et al. Change in  
462 functional balance after an exercise program with Nintendo Wii in Latino patients with  
463 cerebral palsy: a case series. *J Phys Ther Sci.* 2016 Aug;28(8):2414-7.
- 464 [30] Gatica-Rojas V, Cartes-Velásquez R, Guzmán-Muñoz E, et al. Effectiveness of a  
465 Nintendo Wii balance board exercise programme on standing balance of children with  
466 cerebral palsy: A randomised clinical trial protocol. *Contemp Clin Trials Commun.*  
467 2017;6:17-21



- 468 [31] Gatica-Rojas V, Méndez-Rebolledo G, Guzman-Muñoz E, et al. Does Nintendo Wii  
469 Balance Board improve standing balance? A randomised controlled trial in children with  
470 cerebral palsy. *Eur J Phys Rehabil Med.* 2017;53(4):535-544.
- 471 [32] Gatica-Rojas V, Cartes-Velásquez R, Méndez-Rebolledo G, et al. Effects of a  
472 Nintendo Wii exercise program on spasticity and static standing balance in spastic cerebral  
473 palsy. *Dev Neurorehabil.* 2017;20(6):388-391.
- 474 [33] Sakzewski L, Provan K, Ziviani J, et al. Comparison of dosage of intensive upper  
475 limb therapy for children with unilateral cerebral palsy: how big should the therapy pill be?  
476 *Res. Dev. Disabil.* 2015; 37: 9-16.
- 477 [34] Kyvelidou A, Harbourne RT, Shostrom VK, et al. Reliability of center of pressure  
478 measures for assessing the development of sitting postural control in infants with or at risk  
479 of cerebral palsy. *Arch. Phys. Med. Rehabil.* 2010; 91: 1593–601.
- 480 [35] Mitteregger E, Marsico P, Balzer J, et al. Translation and construct validity of the  
481 Trunk Control Measurement Scale in children and youths with brain lesions. *Res. Dev.*  
482 *Disabil.* 2015; 45: 343-52.
- 483 [36] Fahr A, Keller JW, van Hedel HWA. A systematic review of training methods that  
484 may improve selective voluntary motor control in children with spastic cerebral palsy.  
485 *Front. Neurol.* 2020; 11: 572038.
- 486 [37] O'Brien SM, Lichtwark GA, Carroll TJ, et al. Impact of Lower Limb Active  
487 Movement Training in Individuals With Spastic Type Cerebral Palsy on Neuromuscular  
488 Control Outcomes: A Systematic Review. *Front. Neurol.* 2020; 11: 581892.
- 489 [38] Inamdar K, Molinini RM, Panibatla ST, et al. Physical therapy interventions to  
490 improve sitting ability in children with or at-risk for cerebral palsy: a systematic review and  
491 meta-analysis. *Dev. Med. Child Neurol.* 2021; 63: 396-406.
- 492 [39] Liang X, Tan Z, Yun G, et al. Chen. Effectiveness of exercise interventions for  
493 children with cerebral palsy: A systematic review and meta-analysis of randomized  
494 controlled trials. *J. Rehabil, Med.* 2021; 53: jrm00176.
- 495 [40] Levin M and Demers M. Motor learning in neurological rehabilitation. *Disabil*  
496 *Rehabil.* 2021 Dec;43(24):3445-3453
- 497 [41] Bonnechère B, Jansen B, Omelina L, et al. The use of commercial video games in  
498 rehabilitation: a systematic review. *Int. J. Rehabil. Res.* 2016; 39: 277-290.

- 499 [42] Johansen T, Strøm V, Simic J, et al. Effectiveness of training with motion-  
500 controlled commercial video games on hand and arm function in young people with  
501 cerebral palsy: A systematic review and meta-analysis. *J. Rehabil. Med.* 2019; 52:  
502 jrm00012.
- 503 [43] Gatica-Rojas V, Méndez-Rebolledo G. Virtual reality interface devices in the  
504 reorganization of neural networks in the brain of patients with neurological diseases. *Neural*  
505 *Regen. Res.* 2014; 9: 888-96.
- 506 [44] AlSaif AA, Alsenany S. Effects of interactive games on motor performance in  
507 children with spastic cerebral palsy. *J. Phys. Ther. Sci.* 2015; 27: 2001-3.
- 508 [45] Gatica RV, Elgueta CE, Vidal SC, et al. Impacto del entrenamiento del balance a  
509 través de realidad virtual en una población de adultos mayores. *Int. J. Morphol.* 2010; 28;  
510 303-8.
- 511 [46] Bateni H. Changes in balance in older adults based on use of physical therapy vs the  
512 Wii Fit gaming system: a preliminary study. *Physiotherapy.* 2012; 98: 211-6.
- 513 [47] Fung V, Ho A, Shaffer J, et al. Use of Nintendo Wii Fit™ in the rehabilitation of  
514 outpatients following total knee replacement: a preliminary randomised controlled trial.  
515 *Physiotherapy.* 2012; 98: 183-8.
- 516 [48] Pompeu JE, Mendes FA, Silva KG, et al. Effect of Nintendo Wii™-based motor  
517 and cognitive training on activities of daily living in patients with Parkinson's disease: a  
518 randomised clinical trial. *Physiotherapy.* 2012; 98: 196-204.
- 519 [49] Beckers LWME, Geijen MME, Kleijnen J, et al. Feasibility and effectiveness of  
520 home-based therapy programmes for children with cerebral palsy: a systematic review.  
521 *BMJ Open.* 2020; 10: e035454.
- 522 [50] Dias JF, Oliveira VC, Borges PRT, et al. Effectiveness of exercises by  
523 telerehabilitation on pain, physical function and quality of life in people with physical  
524 disabilities: a systematic review of randomised controlled trials with GRADE  
525 recommendations. *Br. J. Sports Med.* 2021; 5
- 526 [51] Cofré Lizama LE, Pijnappels M, Faber GH, et al.: Age effects on mediolateral  
527 balance control. *PLoS One*, 2014, 9: e110757.

- 528 [52] Rafał S, Janusz M, Wiesław O, et al.: Test-retest reliability of measurements of the  
529 center of pressure displacement in quiet standing and during maximal voluntary body  
530 leaning among healthy elderly men. *J Hum Kinet*, 2011, 28: 15-23.
- 531 [53] Kubicki A. Functional assessment in older adults: should we use timed up and go or  
532 gait speed test?. *Neurosci Lett*, 2014, 577: 89-94.
- 533 [54] Gatica-Rojas et al. Correlation between center of pressure and functional balance in  
534 non-faller elderly practitioners of Tai Chi Chuan. *J. Phys. Ther. Sci.* 28: 2350–2352, 2016
- 535 [55] Wang TN, Chen YL, Shieh JY, et al. Commercial Exergaming in Home-Based  
536 Pediatric Constraint-Induced Therapy: A Randomized Trial. *OTJR (Thorofare N J)* 2021;  
537 1539449220984110.
- 538 [56] Avcil E, Tarakci D, Arman N, et al. Upper extremity rehabilitation using video  
539 games in cerebral palsy: a randomized clinical trial. *Acta Neurol. Belg.* 2021; 121(4):1053-  
540 1060.
- 541 [57] Farr WJ, Green D, Bremner S, et al. Feasibility of a randomised controlled trial to  
542 evaluate home-based virtual reality therapy in children with cerebral palsy. *Disabil.*  
543 *Rehabil.* 2021; 43: 85-97.

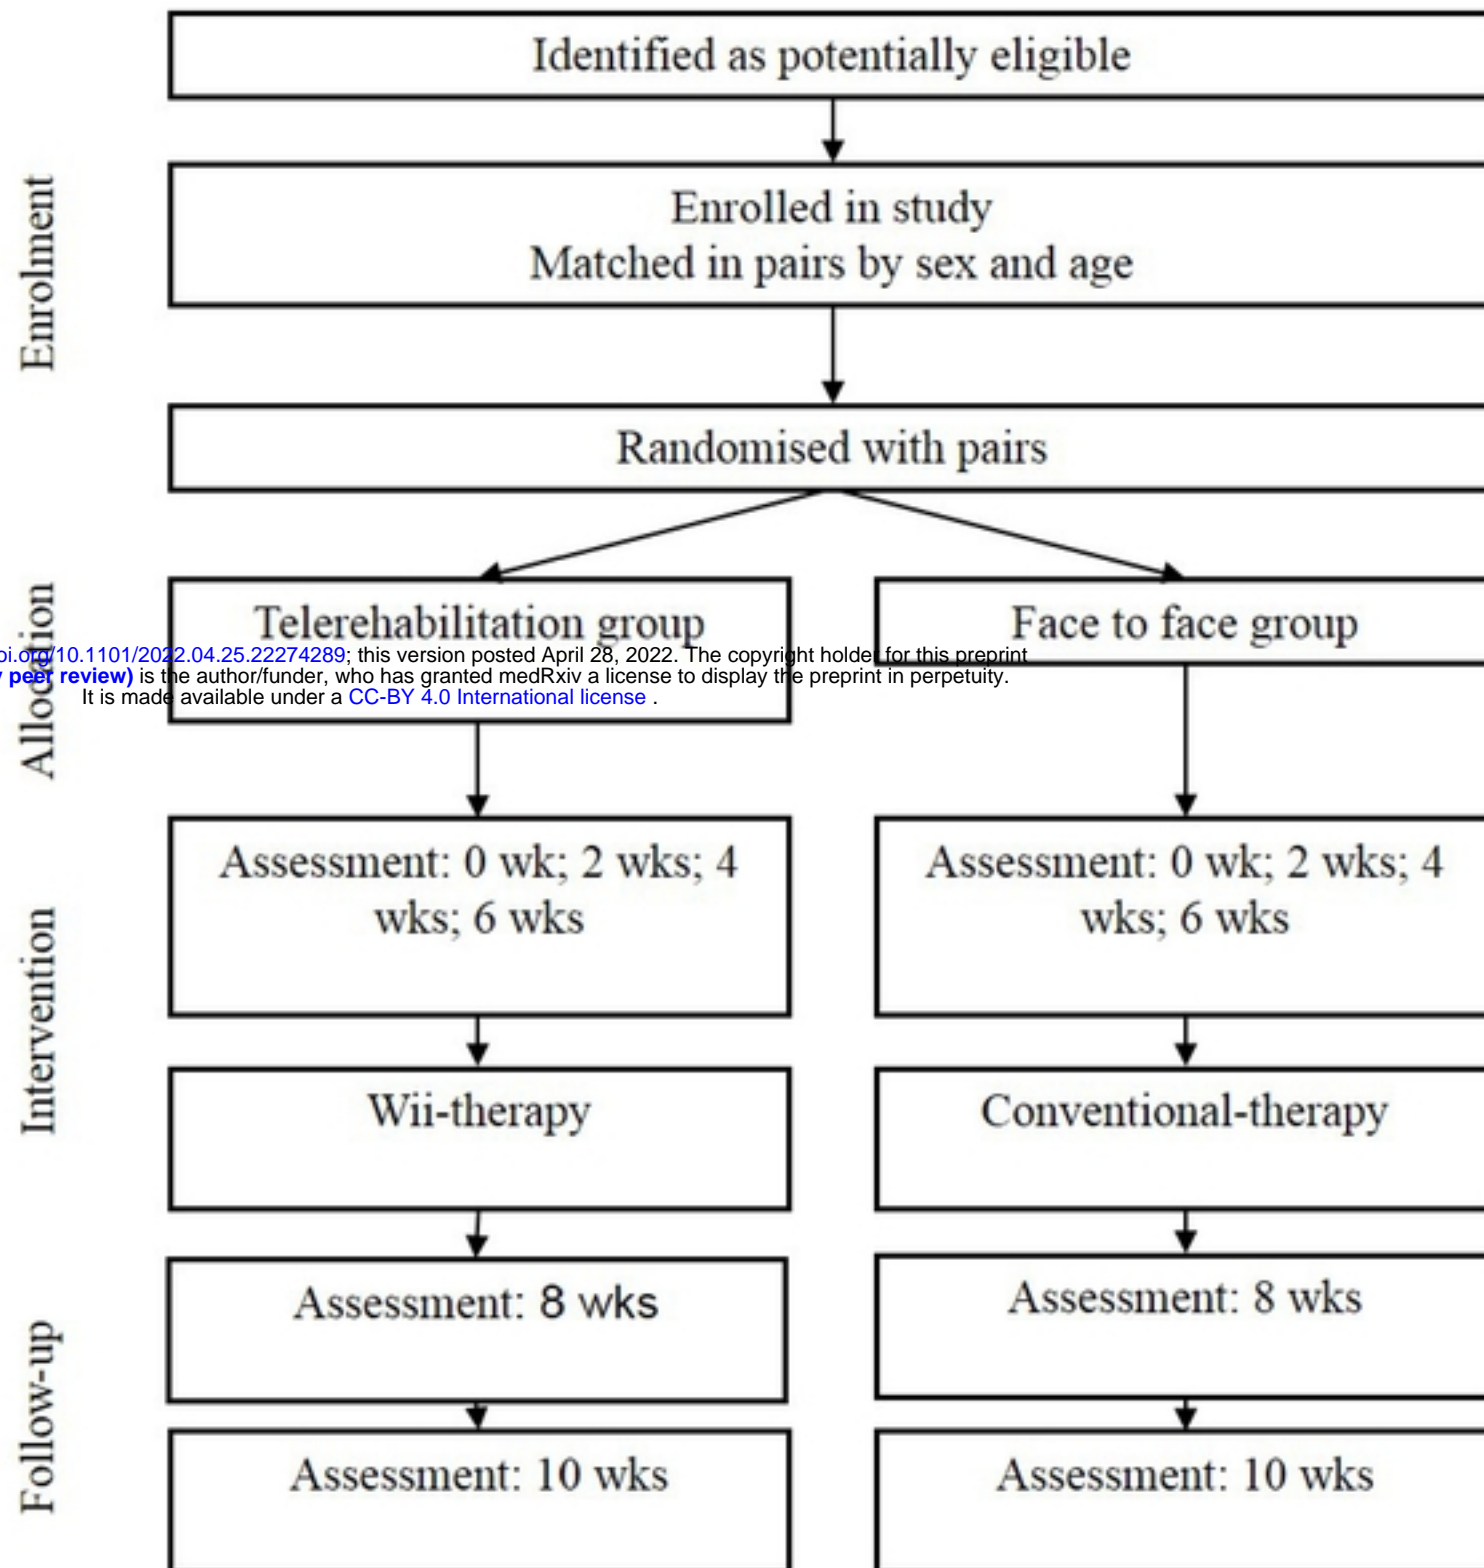

medRxiv preprint doi: <https://doi.org/10.1101/2022.04.25.22274289>; this version posted April 28, 2022. The copyright holder for this preprint (which was not certified by peer review) is the author/funder, who has granted medRxiv a license to display the preprint in perpetuity. It is made available under a [CC-BY 4.0 International license](https://creativecommons.org/licenses/by/4.0/).

1  
2  
3  
4  
5  
6  
7  
8  
9  
10  
11

12

13

14

15

16

17

18

19

medRxiv preprint doi: <https://doi.org/10.1101/2022.04.25.22274289>; this version posted April 28, 2022. The copyright holder for this preprint (which was not certified by peer review) is the author/funder, who has granted medRxiv a license to display the preprint in perpetuity. It is made available under a [CC-BY 4.0 International license](#).

21

22 **Figure 1:** Flow chart according to the Standard Protocol Items: Recommendations for  
23 Interventional Trials (SPIRIT). Participants, assessments and interventions. Through the  
24 two groups of the trial.
